# Supplementary material for: First-principles study on structural, electronic and optical properties of halide double perovskite Cs2AgBX6 (B = In, Sb; X = F, Cl, Br, I)
Source: Royal Society of Chemistry journal article supplement (doi:10.1039/d3ra02566g), 2023-01-01
Supplement: d3ra02566g1.pdf [file d3ra02566g1.pdf]

## Electronic supplementary information – First-principles study on structural, electronic and optical properties of halide double perovskite $\text{Cs}_2\text{AgBX}_6$ (B = In, Sb; X = F, Cl, Br, I)

Chol-Jun Yu\*, Il-Chol Ri, Hak-Myong Ri, Jong-Hyok Jang, Yun-Sim Kim and Un-Gi Jong

*Computational Materials Design, Faculty of Materials Science, Kim Il Sung University,  
Pyongyang, PO Box 76, Democratic People's Republic of Korea*

Table S1. Total energy ( $E_{\text{tot}}$ ) and total energy per formula unit (fu) of elementary and binary solids with crystalline phase and space group.

| Solid             | Phase        | Space group  | Ref. | $E_{\text{tot}}$ (Ry) | $E_{\text{tot}}$ per fu (Ry) |
|-------------------|--------------|--------------|------|-----------------------|------------------------------|
| Cs                | fcc          | $Fm\bar{3}m$ | [1]  | -252.261140           | -63.065285                   |
|                   | bcc          | $Im\bar{3}m$ | [1]  | -126.130728           | -63.065364                   |
| Ag                | fcc          | $Fm\bar{3}m$ | [2]  | -1182.487992          | -295.621998                  |
| In                | tetragonal   | $I4/MMM$     | [3]  | -266.963872           | -133.481936                  |
|                   | orthorhombic | $Fmmm$       | [4]  | -533.916447           | -133.479112                  |
| Sb                | fcc          | $Fm\bar{3}m$ | [5]  | -739.705388           | -184.926347                  |
|                   | tetragonal   | $I4/MMM$     | [5]  | -369.909949           | -184.954974                  |
|                   | hexagonal    | $R3mh$       | [6]  | -1109.711095          | -184.951849                  |
| AgF               | cubic        | $Fm\bar{3}m$ |      | -1376.882710          | -344.220678                  |
| AgCl              | cubic        | $Fm\bar{3}m$ | [7]  | -1315.916179          | -328.979045                  |
| AgBr              | cubic        | $Fm\bar{3}m$ | [8]  | -1370.075394          | -342.518849                  |
| AgI               | cubic        | $Fm\bar{3}m$ | [9]  | -1445.211938          | -361.302985                  |
|                   | hexagonal    | $P63mc$      | [10] | -722.632490           | -361.316245                  |
|                   | zinc blende  | $F\bar{4}3m$ | [9]  | -1445.267447          | -361.316862                  |
| CsF               | cubic        | $Fm\bar{3}m$ | [12] | -447.652490           | -111.913122                  |
|                   | cubic        | $Pm\bar{3}m$ | [11] | -111.897148           | -111.897148                  |
| CsCl              | cubic        | $Fm\bar{3}m$ | [12] | -386.585878           | -96.646470                   |
|                   | cubic        | $Pm\bar{3}m$ | [11] | -96.641591            | -96.641591                   |
| CsBr              | cubic        | $Fm\bar{3}m$ | [12] | -440.706264           | -110.176566                  |
|                   | cubic        | $Pm\bar{3}m$ | [11] | -110.172869           | -110.172869                  |
| CsI               | cubic        | $Fm\bar{3}m$ | [12] | -515.767250           | -128.941813                  |
|                   | cubic        | $Pm\bar{3}m$ | [11] | -128.940813           | -128.940813                  |
| InF <sub>3</sub>  | monoclinic   | $C12/m1$     | [13] | -1118.322334          |                              |
| InCl <sub>3</sub> | monoclinic   | $C12/m1$     |      | -934.731573           |                              |
| InBr <sub>3</sub> | monoclinic   | $C12/m1$     |      | -1097.071959          |                              |
| InI <sub>3</sub>  | monoclinic   | $P121/c1$    | [14] | -1322.317962          |                              |
| SbF <sub>3</sub>  | orthorhombic | $Pnma$       | [15] | -1324.036195          |                              |
| SbCl <sub>3</sub> | orthorhombic | $Pnma$       |      | -1140.329477          |                              |
| SbBr <sub>3</sub> | orthorhombic | $Pbnm$       |      | -1302.674655          |                              |
| SbI <sub>3</sub>  | monoclinic   | $P121/c1$    |      | -1527.973965          |                              |

\*Corresponding author: Chol-Jun Yu, Email: cj.yu@ryongnamsan.edu.kp

Table S2. Total energy ( $E_{\text{tot}}$ ) of halide double perovskites  $\text{CsAgBX}_6$  (B = In, Sb; X = F, Cl, Br, I) and elementary substances of Cs, Ag, In, Sb and  $\text{X}_2$ , and the elementary formation energy ( $E_f$ ) per formula unit (fu).

| Compound                     | $E_{\text{tot}}$ (Ry) | $E_{\text{tot}}$ (Ry) |              |             |              | $\Delta E$ (Ry) | $E_f$ (eV/fu) |
|------------------------------|-----------------------|-----------------------|--------------|-------------|--------------|-----------------|---------------|
|                              |                       | Cs                    | Ag           | In/Sb       | $\text{X}_2$ |                 |               |
| $\text{Cs}_2\text{AgInF}_6$  | -847.752926           | -126.130728           | -1182.487992 | -266.963872 | -96.918306   | -1.7633         | -23.9915      |
| $\text{Cs}_2\text{AgInCl}_6$ | -756.016824           | -126.130728           | -1182.487992 | -266.963872 | -66.573755   | -1.0609         | -14.4342      |
| $\text{Cs}_2\text{AgInBr}_6$ | -837.175734           | -126.130728           | -1182.487992 | -266.963872 | -93.671579   | -0.9263         | -12.6034      |
| $\text{Cs}_2\text{AgInI}_6$  | -949.782210           | -126.130728           | -1182.487992 | -266.963872 | -131.271802  | -0.7321         | -9.9613       |
| $\text{Cs}_2\text{AgSbF}_6$  | -899.126947           | -126.130728           | -1182.487992 | -369.909949 | -96.918306   | -1.6643         | -22.6443      |
| $\text{Cs}_2\text{AgSbCl}_6$ | -807.416302           | -126.130728           | -1182.487992 | -369.909949 | -66.573755   | -0.9873         | -13.4334      |
| $\text{Cs}_2\text{AgSbBr}_6$ | -888.595342           | -126.130728           | -1182.487992 | -369.909949 | -93.671579   | -0.8729         | -11.8764      |
| $\text{Cs}_2\text{AgSbI}_6$  | -1001.224795          | -126.130728           | -1182.487992 | -369.909949 | -131.271802  | -0.7017         | -9.5469       |

Table S3. Total energy ( $E_{\text{tot}}$ ) of halide double perovskites  $\text{CsAgBX}_6$  and the binary compounds of  $\text{CsX}$ ,  $\text{AgX}$  and  $\text{BX}_3$ , and the binary formation energy ( $E_f$ ) per formula unit (fu).

| Compound                     | $E_{\text{tot}}$ (Ry) | $E_{\text{tot}}$ (Ry) |              |               | $\Delta E$ (Ry) | $E_f$ (eV/fu) |
|------------------------------|-----------------------|-----------------------|--------------|---------------|-----------------|---------------|
|                              |                       | $\text{CsX}$          | $\text{AgX}$ | $\text{BX}_3$ |                 |               |
| $\text{Cs}_2\text{AgInF}_6$  | -847.752926           | -447.652490           | -1376.882710 | -1118.322334  | -0.1254         | -1.7064       |
| $\text{Cs}_2\text{AgInCl}_6$ | -756.016824           | -386.585878           | -1315.916179 | -934.731573   | -0.0619         | -0.8428       |
| $\text{Cs}_2\text{AgInBr}_6$ | -837.175734           | -440.706264           | -1370.075394 | -1097.071959  | -0.0358         | -0.4866       |
| $\text{Cs}_2\text{AgInI}_6$  | -949.782210           | -515.767250           | -1445.267447 | -1322.317962  | -0.0022         | -0.0304       |
| $\text{Cs}_2\text{AgSbF}_6$  | -899.126947           | -447.652490           | -1376.882710 | -1324.036195  | -0.0710         | -0.9657       |
| $\text{Cs}_2\text{AgSbCl}_6$ | -807.416302           | -386.585878           | -1315.916179 | -1140.329477  | -0.0619         | -0.8429       |
| $\text{Cs}_2\text{AgSbBr}_6$ | -888.595342           | -440.706264           | -1370.075394 | -1302.674655  | -0.0547         | -0.7442       |
| $\text{Cs}_2\text{AgSbI}_6$  | -1001.224795          | -515.767250           | -1445.267447 | -1527.990350  | -0.0267         | -0.3636       |

Table S4. Effective mass of electron ( $m_e$ ) and hole ( $m_h$ ) in the three Cartesian directions ( $x, y, z$ ), and their harmonic mean values calculated by  $m^* = 3/(1/m_x + 1/m_y + 1/m_z)$ .

| Compound                     | $m_e$  |        |        |        | $m_h$  |        |        |        |
|------------------------------|--------|--------|--------|--------|--------|--------|--------|--------|
|                              | $x$    | $y$    | $z$    | $m^*$  | $x$    | $y$    | $z$    | $m^*$  |
| $\text{Cs}_2\text{AgInF}_6$  | 0.4090 | 0.4090 | 0.4090 | 0.4090 | 1.1829 | 1.1829 | 1.7791 | 1.3317 |
| $\text{Cs}_2\text{AgInCl}_6$ | 0.2716 | 0.2716 | 0.2716 | 0.2716 | 0.4626 | 0.4626 | 0.6030 | 0.5015 |
| $\text{Cs}_2\text{AgInBr}_6$ | 0.1614 | 0.1614 | 0.1614 | 0.1614 | 0.3392 | 0.3392 | 0.5077 | 0.3814 |
| $\text{Cs}_2\text{AgInI}_6$  | 0.1062 | 0.1062 | 0.1062 | 0.1062 | 0.2433 | 0.2433 | 0.4212 | 0.2832 |
| $\text{Cs}_2\text{AgSbF}_6$  | 0.6062 | 0.5826 | 0.5769 | 0.5883 | 0.5974 | 1.0447 | 0.7601 | 0.7601 |
| $\text{Cs}_2\text{AgSbCl}_6$ | 0.3646 | 0.3511 | 0.3479 | 0.3544 | 0.3382 | 0.5879 | 0.4294 | 0.4294 |
| $\text{Cs}_2\text{AgSbBr}_6$ | 0.2803 | 0.2659 | 0.2625 | 0.2693 | 0.2911 | 0.5181 | 0.3728 | 0.3728 |
| $\text{Cs}_2\text{AgSbI}_6$  | 0.2088 | 0.1895 | 0.1852 | 0.1940 | 0.2536 | 0.4508 | 0.3246 | 0.3246 |

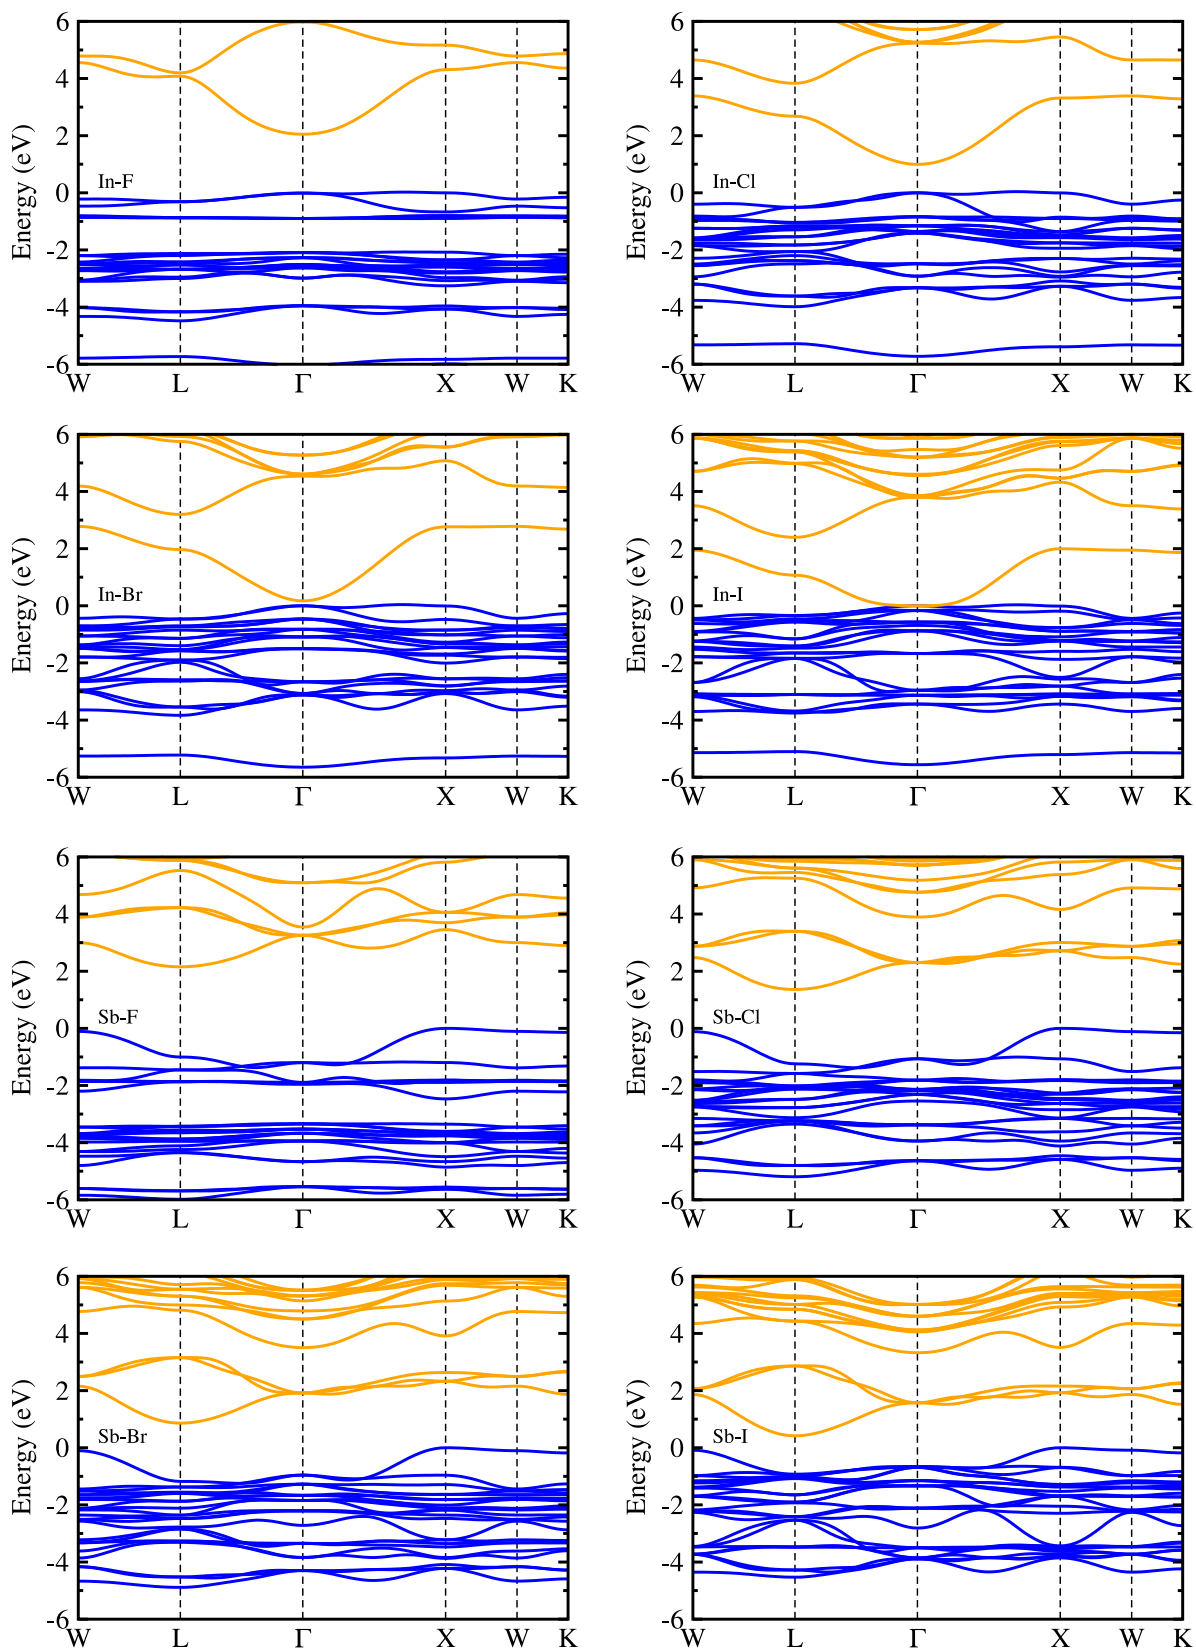

Figure S1. Electronic band structures of all-inorganic halide double perovskites  $\text{Cs}_2\text{AgBX}_6$  ( $B = \text{In}, \text{Sb}$ ;  $X = \text{F}, \text{Cl}, \text{Br}, \text{I}$ ), calculated with PBE functional.

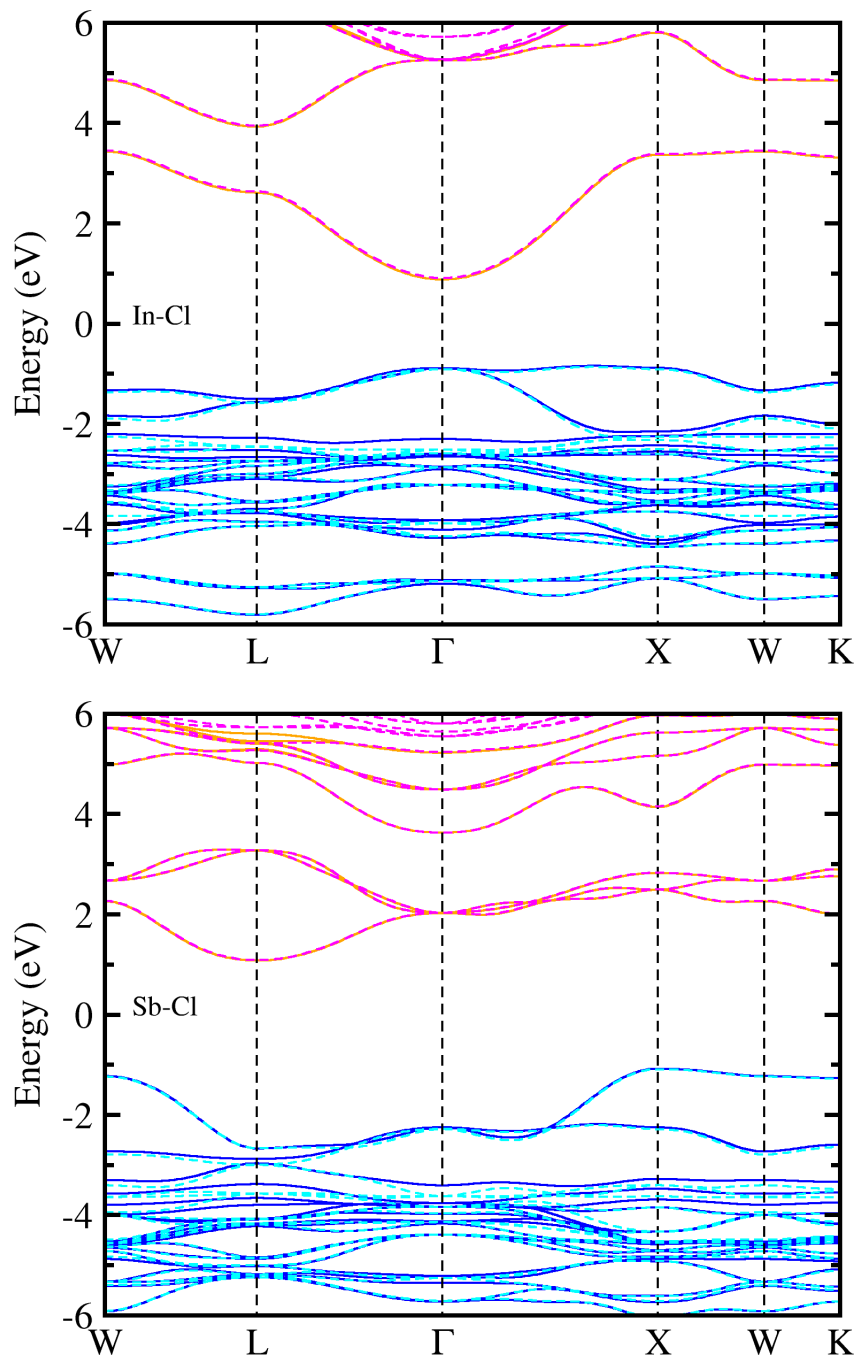

Figure S2. Electronic band structures of all-inorganic halide double perovskites  $\text{Cs}_2\text{AgInCl}_6$  (top) and  $\text{Cs}_2\text{AgSbCl}_6$  (bottom), calculated with PBE (solid lines) and PBE+SOC (dashed lines).

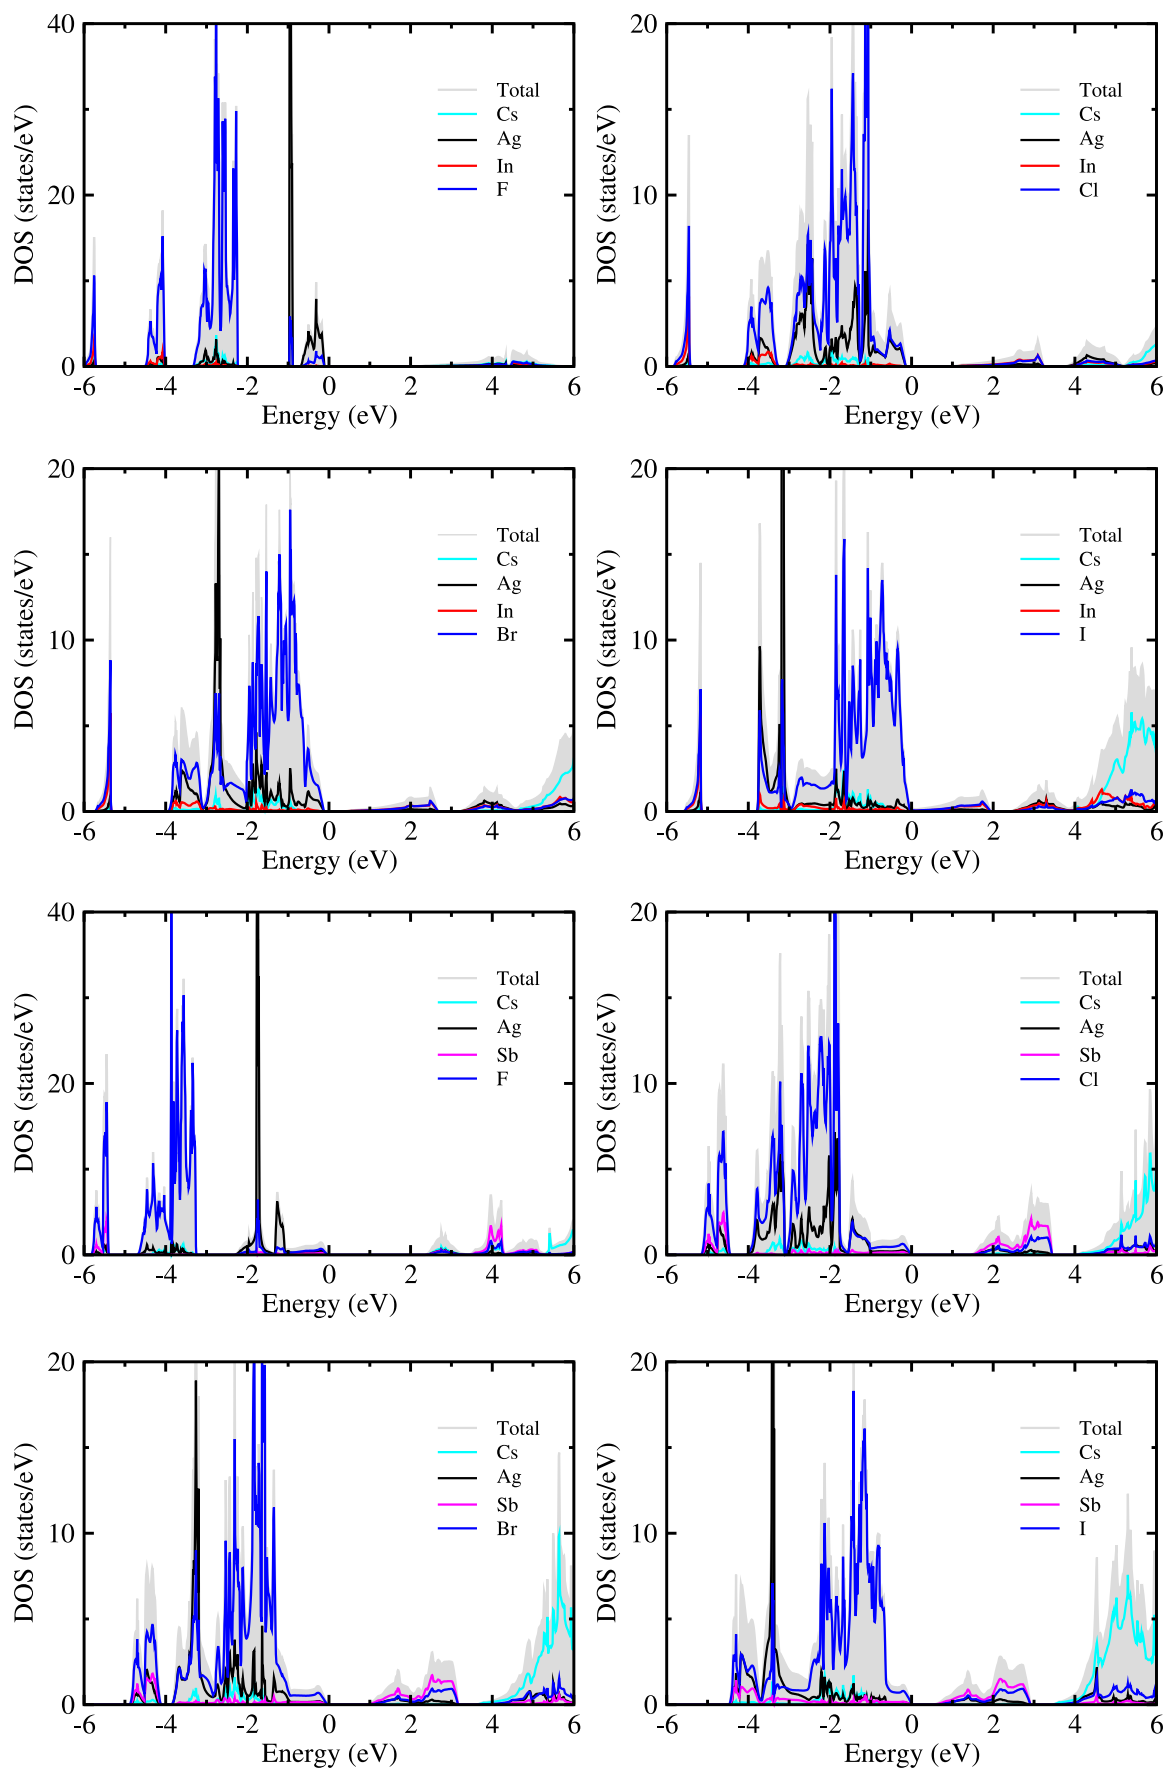

Figure S3. Atom-projected total density of states (DOS) of all-inorganic halide double perovskites  $\text{Cs}_2\text{AgBX}_6$  ( $\text{B} = \text{In}, \text{Sb}$ ;  $\text{X} = \text{F}, \text{Cl}, \text{Br}, \text{I}$ ), calculated with HSE hybrid functional.

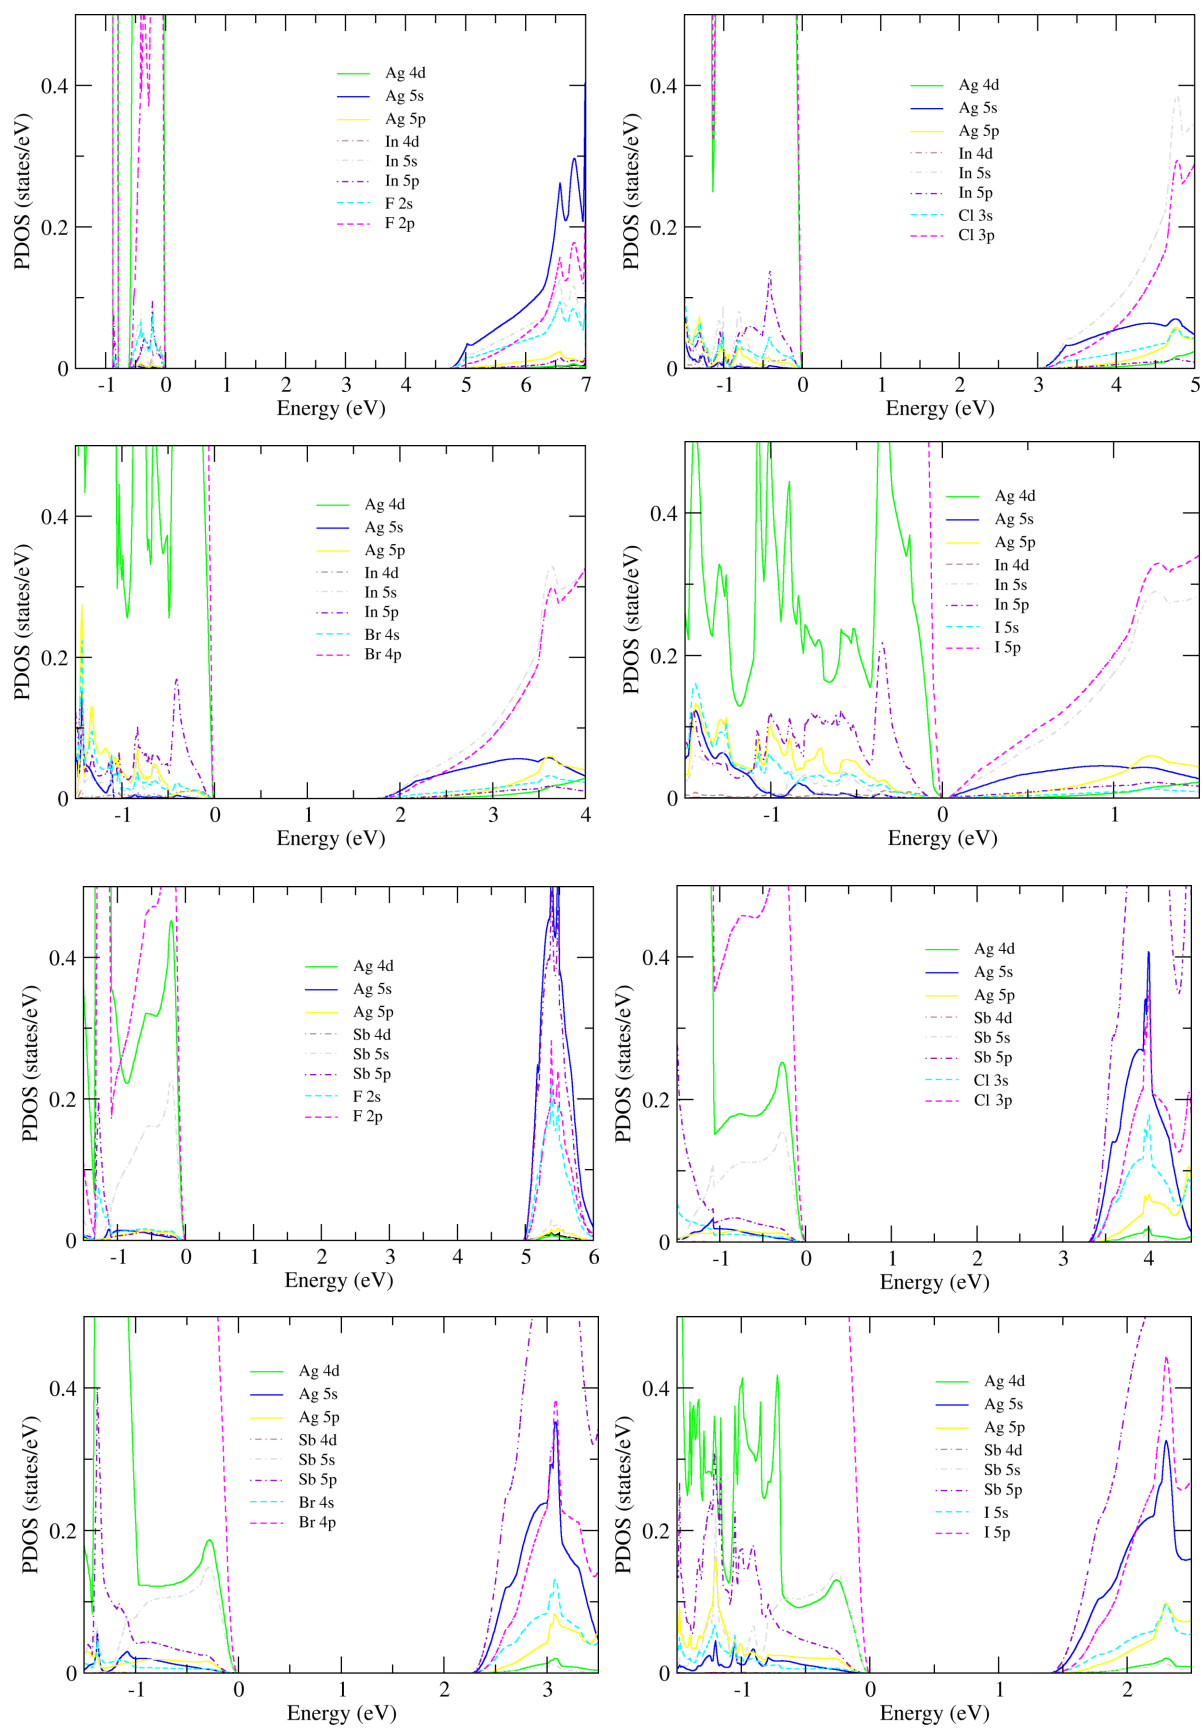

Figure S4. Orbital-resolved partial density of states (PDOS) of all-inorganic halide double perovskites  $\text{Cs}_2\text{AgBX}_6$  ( $\text{B} = \text{In}, \text{Sb}$ ;  $\text{X} = \text{F}, \text{Cl}, \text{Br}, \text{I}$ ), calculated with HSE hybrid functional.

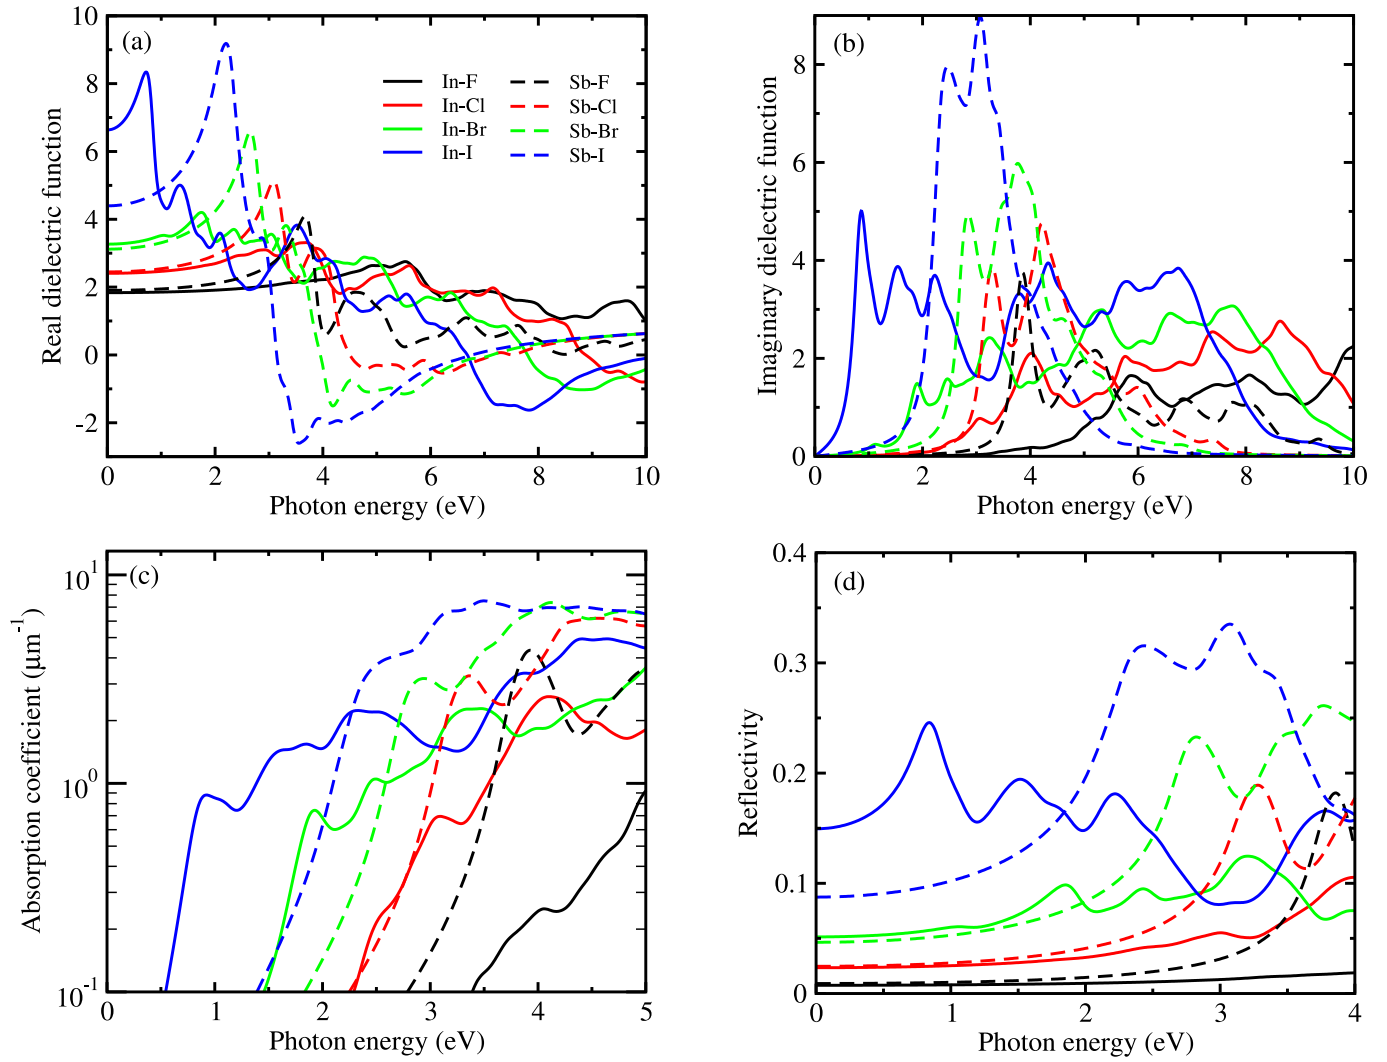

Figure S5. (a) Real and (b) imaginary parts of macroscopic dielectric functions, (c) photo-absorption coefficients, and (d) reflectivity as functions of photon energy for  $\text{Cs}_2\text{AgBX}_6$  ( $B = \text{In, Sb}$ ;  $X = \text{F, Cl, Br, I}$ ), calculated with the  $GW$  energies within RPA (i.e.,  $GW$ -RPA).

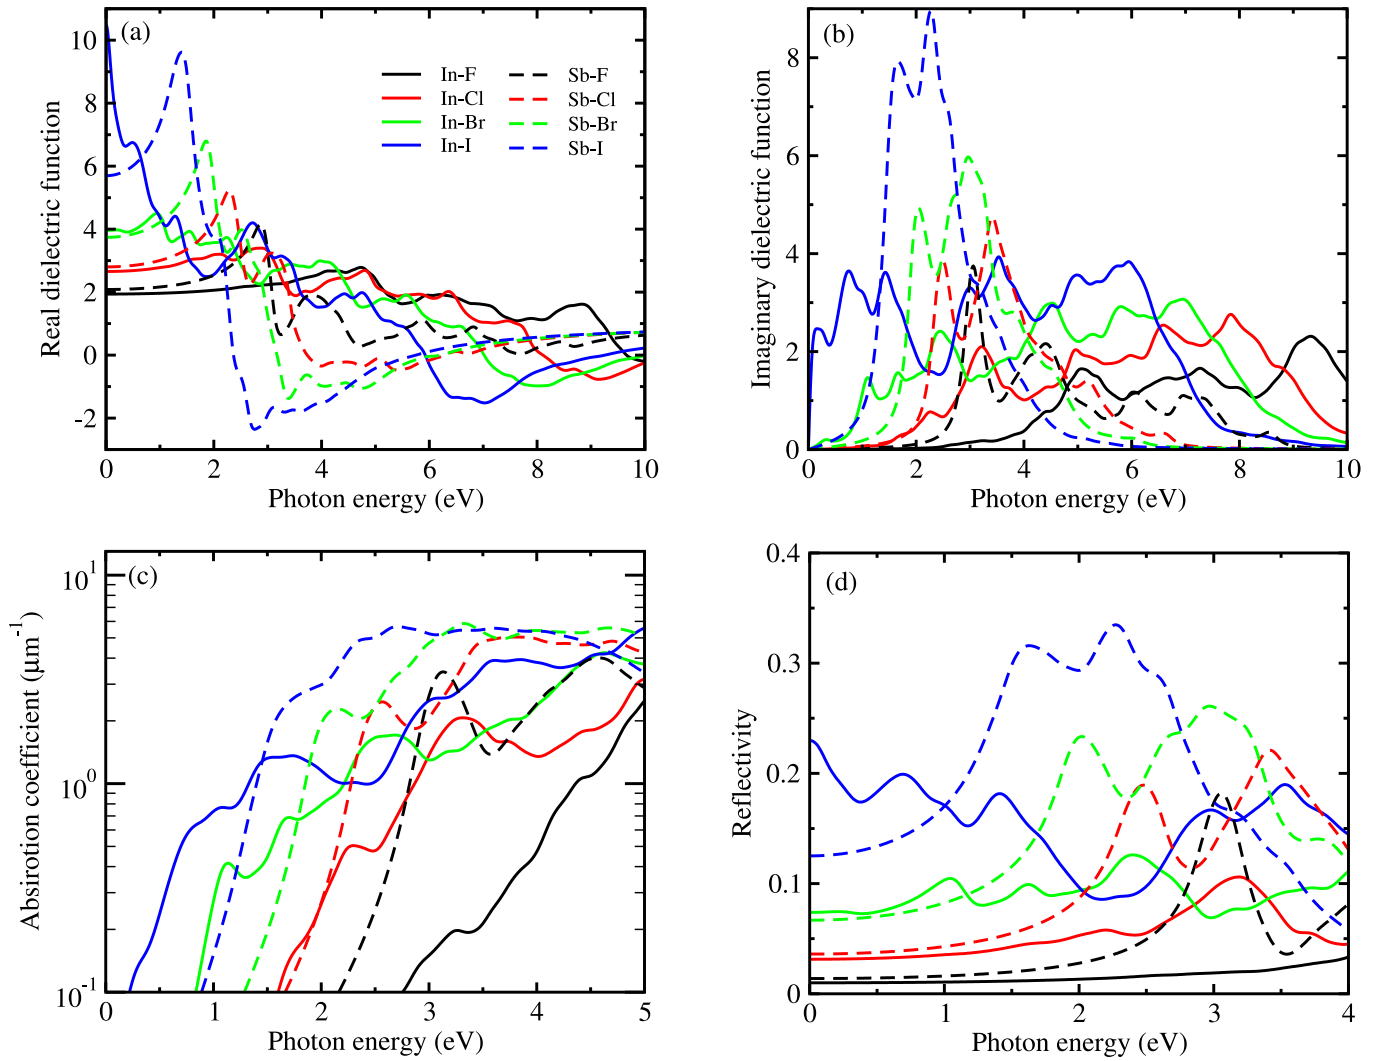

Figure S6. (a) Real and (b) imaginary parts of macroscopic dielectric functions, (c) photo-absorption coefficients, and (d) reflectivity as functions of photon energy for  $\text{Cs}_2\text{AgBX}_6$  ( $B = \text{In, Sb}$ ;  $X = \text{F, Cl, Br, I}$ ), calculated with the Kohn-Sham energies within RPA (i.e., KS-RPA).



---

## References

- [1] C. E. Weir, G. J. Piermarini, S. Block, On the crystal structures of Cs II and Ga II, *J. Chem. Phys.* **1971**, *54*, 2768–2770.
- [2] I.-K. Suh, H. Ohta, Y. Waseda, High-temperature thermal expansion of six metallic elements measured by dilatation method and X-ray diffraction, *J. Mater. Sci.* **1988**, *23*, 757–760.
- [3] E. G. Moshopoulou, R. M. Ibberson, J. L. Sarrao, J. D. Thompson, Z. Fisk, Structure of Ce<sub>2</sub>RhIn<sub>8</sub>: an example of complementary use of high-resolution neutron powder diffraction and reciprocal-space mapping to study complex materials, *Acta Crystal. B* **2006**, *62*, 173–189.
- [4] K. Takemura, H. Fujihaza, High-pressure structural phase transition in indium, *Phys. Rev. B* **1993**, *47*, 8465–8470.
- [5] D. Akhtar, V. D. Vankar, T. C. Goel, K. L. Chopra, Metastable structures of liquid-quenched and vapour-quenched antimony films, *J. Mater. Sci.* **1979**, *14*, 988–994.
- [6] J. Q. Li, X. W. Feng, M. A. Sun, W. Q. Ao, F. S. Liu, Y. Du, Solvothermal synthesis of nano-sized skutterudite Co<sub>4-x</sub>Fe<sub>x</sub>Sb<sub>12</sub> powders, *Mater. Chem. Phys.* **2008**, *112*, 57–62.
- [7] S. Hull, D. A. Keen, Pressure-induced phase transitions in AgCl, AgBr, and AgI, *Phys. Rev. B* **1999**, *59*, 750–761.
- [8] T. Benmessabih, B. Amrani, F. El haj Hassan, F. Hamdache, M. Zoeter, Computational study of AgCl and AgBr semiconductors, *Physica B* **2007**, *392*, 309–317.
- [9] B. Amrani, R. Ahmed, F. El haj Hassan, A. H. Reshak, Structural, electronic and optical properties of AgI under pressure, *Phys. Lett. A* **2008**, *372*, 2502–2508.
- [10] A. Yoshiasa, K. Koto, K. Kanamaru, S. Emura, H. Horiuchi, Anharmonic thermal vibrations in wurtzite-type AgI, *Acta Crystal. B* **1987**, *43*, 434–440.
- [11] P. Cortona, Direct determination of self-consistent total energies and charge densities of solids: A study of the cohesive properties of the alkali halides, *Phys. Rev. B* **1992**, *46*, 2008–2014.
- [12] M. Blackman, I. H. Khan, The polymorphism of thallium and other halides at low temperatures, *Proc. Phys. Soc. London* **1961**, *77*, 471–475.
- [13] C. Hebecker, R. Hoppe, Zur Kristallstruktur von Indium- und Thallium trifluorid, *Naturwissenschaften* **1966**, *53*, 104.
- [14] J. D. Forrester, A. Zalkin, D. H. Templeton, Crystal and Molecular Structure of Indium(III) Iodide (In<sub>2</sub>I<sub>6</sub>), *Inorg. Chem.* **1964**, *3*, 63–67.
- [15] A. J. Edwards, Fluoride crystal structures. Part XIV. Antimony trifluoride: A redetermination, *J. Chem. Soc. A* **1970**, *1970*, 2751–2753.
